# Supplementary material
Source: MDPI journal article supplement (https://www.mdpi.com/2073-4344/13/2/398)
Supplement: s1 [file s1]

## Electronic Supplementary Information

# Mechanochemical Synthesized $\text{CaO}/\text{ZnCo}_2\text{O}_4$ Nanocomposites for Biodiesel Production

Katabathini Narasimharao \*, Mohamed Mokhtar M. Mostafa \*, Zahra M. Al-Amshany and Wejdan Bajafar

Department of Chemistry, Faculty of Science, King Abdulaziz University, P.O. Box 80203, Jeddah 21589, Saudi Arabia

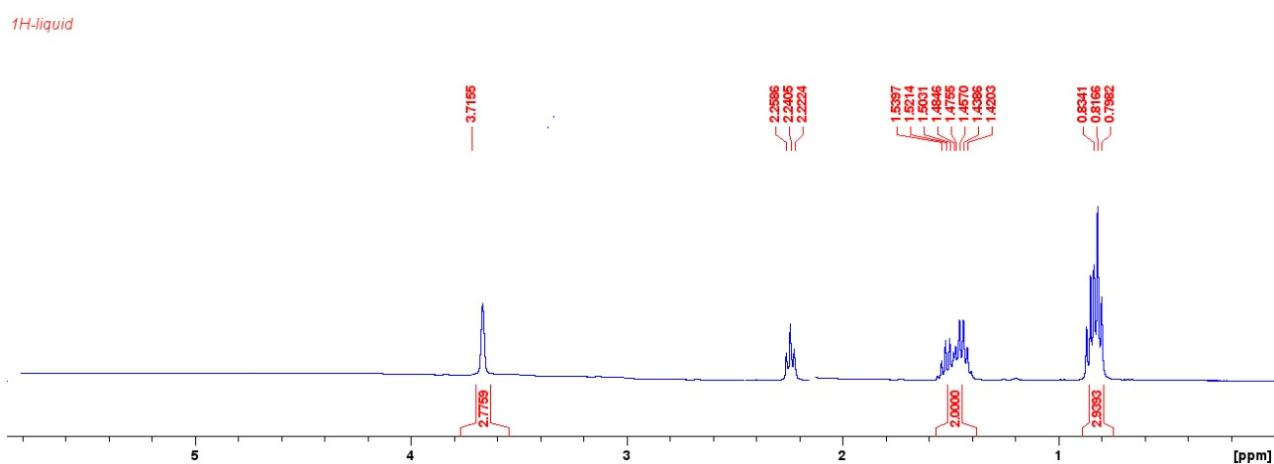

Figure. S1.  $^1\text{H}$  NMR of biodiesel (methyl butyrate).

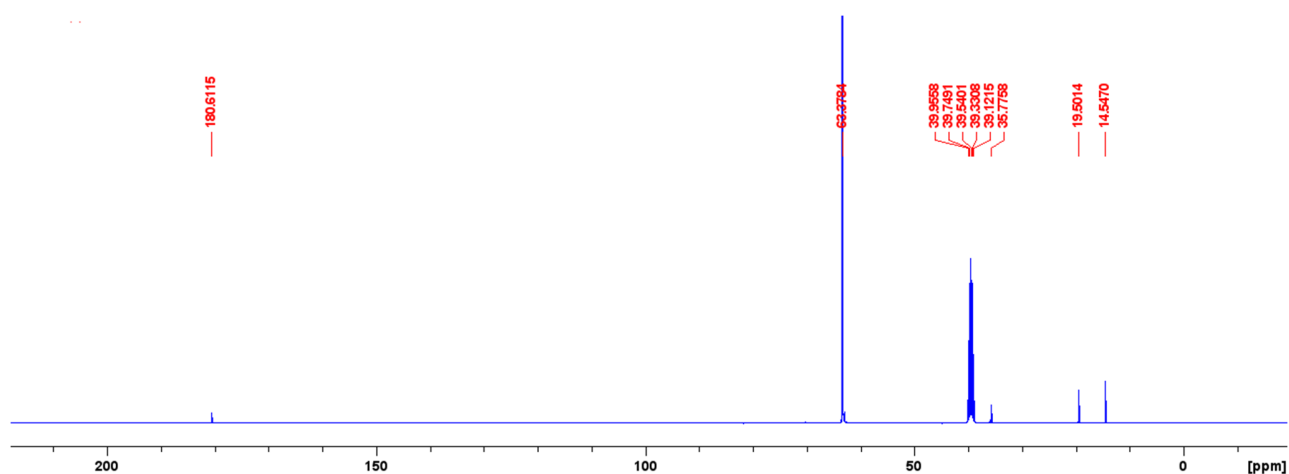

Figure. S2.  $^{13}\text{C}$  NMR of biodiesel (methyl butyrate).

NMR Data of the isolated sample

## Electronic Supplementary Information

$^1\text{H}$ NMR (400 MHz, DMSO),  $\delta$ : 0.82 (t, 3H,  $J = 7\text{ Hz}$ ,  $\text{CH}_3$ ), 1.42-1.54 (m, 2H,  $\text{CH}_2$ ), 2.24 (t, 2H,  $J = 7.2\text{ Hz}$ ,  $\text{CH}_3$ ), 3.71 (s, 3H,  $\text{OCH}_3$ );  $^{13}\text{C}$  NMR  $\delta$ : 14.54, 19.51, 35.78, 63.38, 180.63.
